# Supplementary material
Source: PubMed Central journal article supplement (PMC11162149)
Supplement: NIHMS531931-supplement-02.pdf [file NIHMS531931-supplement-02.pdf]

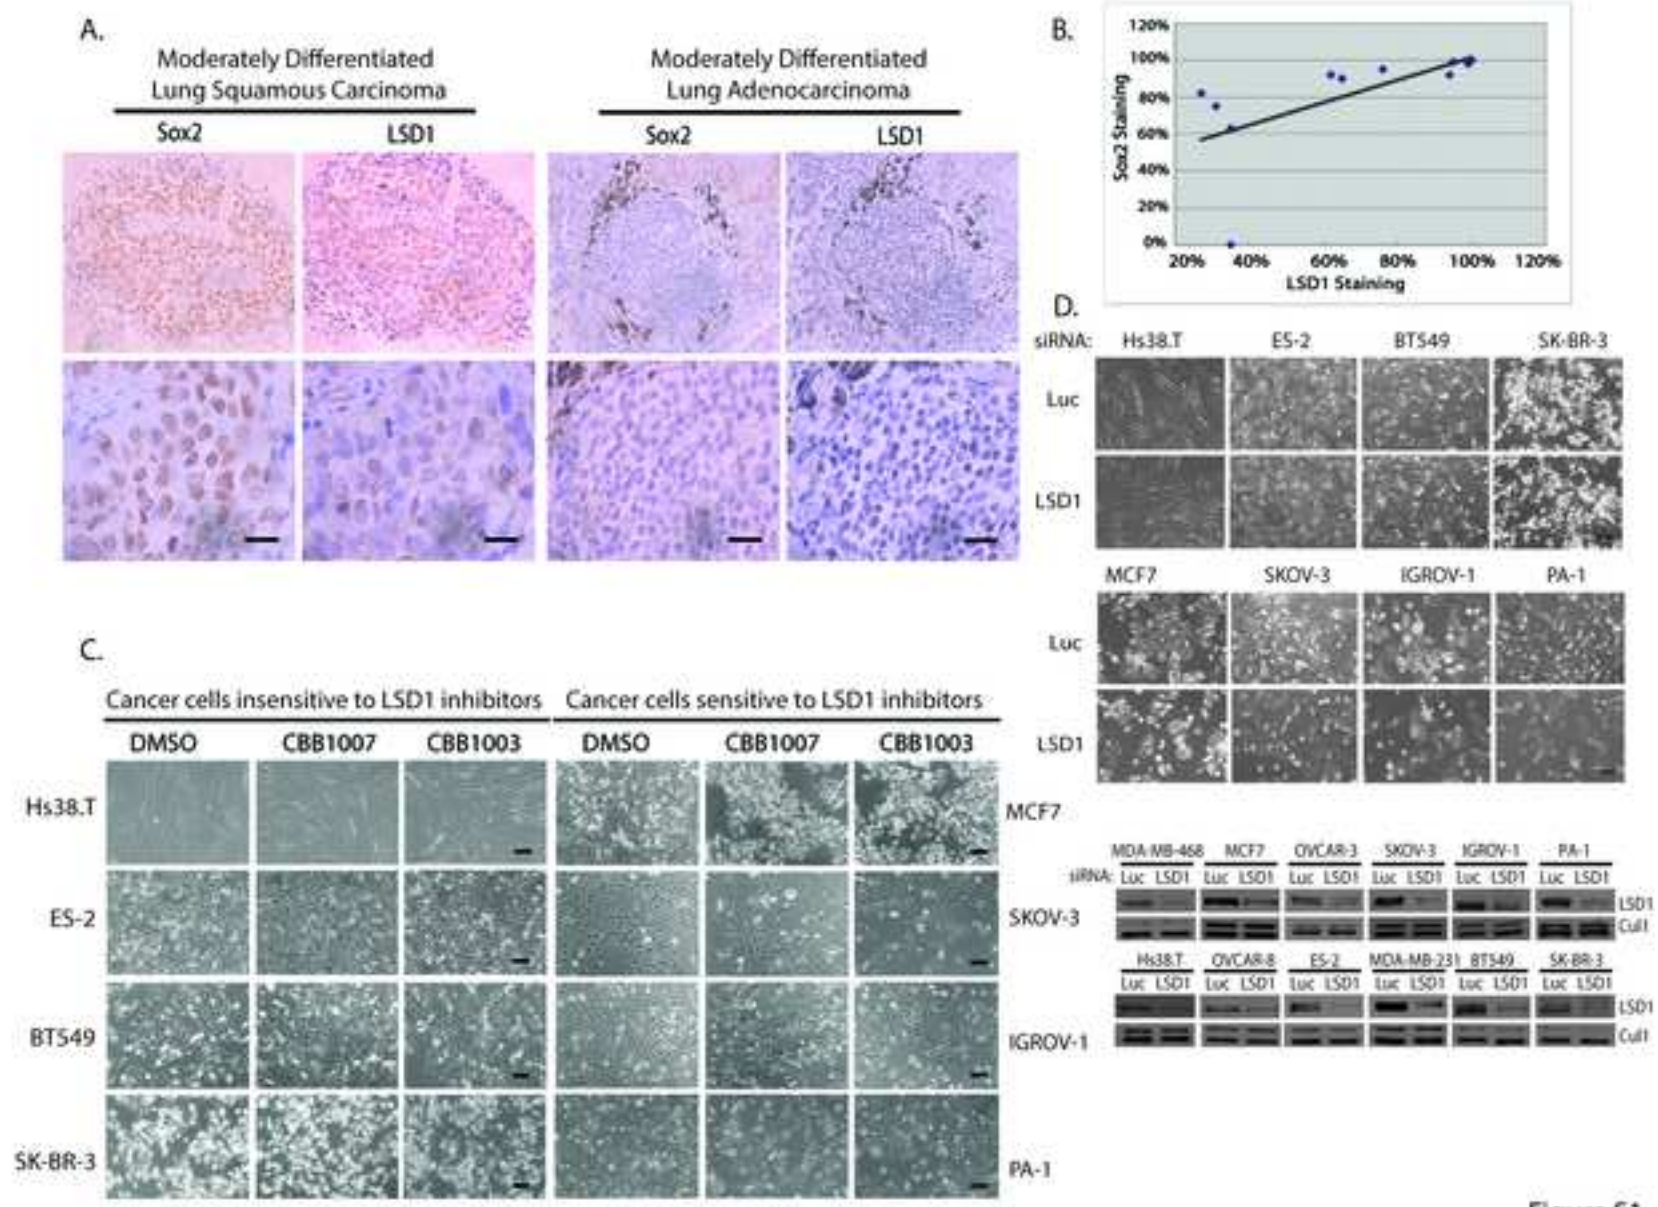

Figure S1

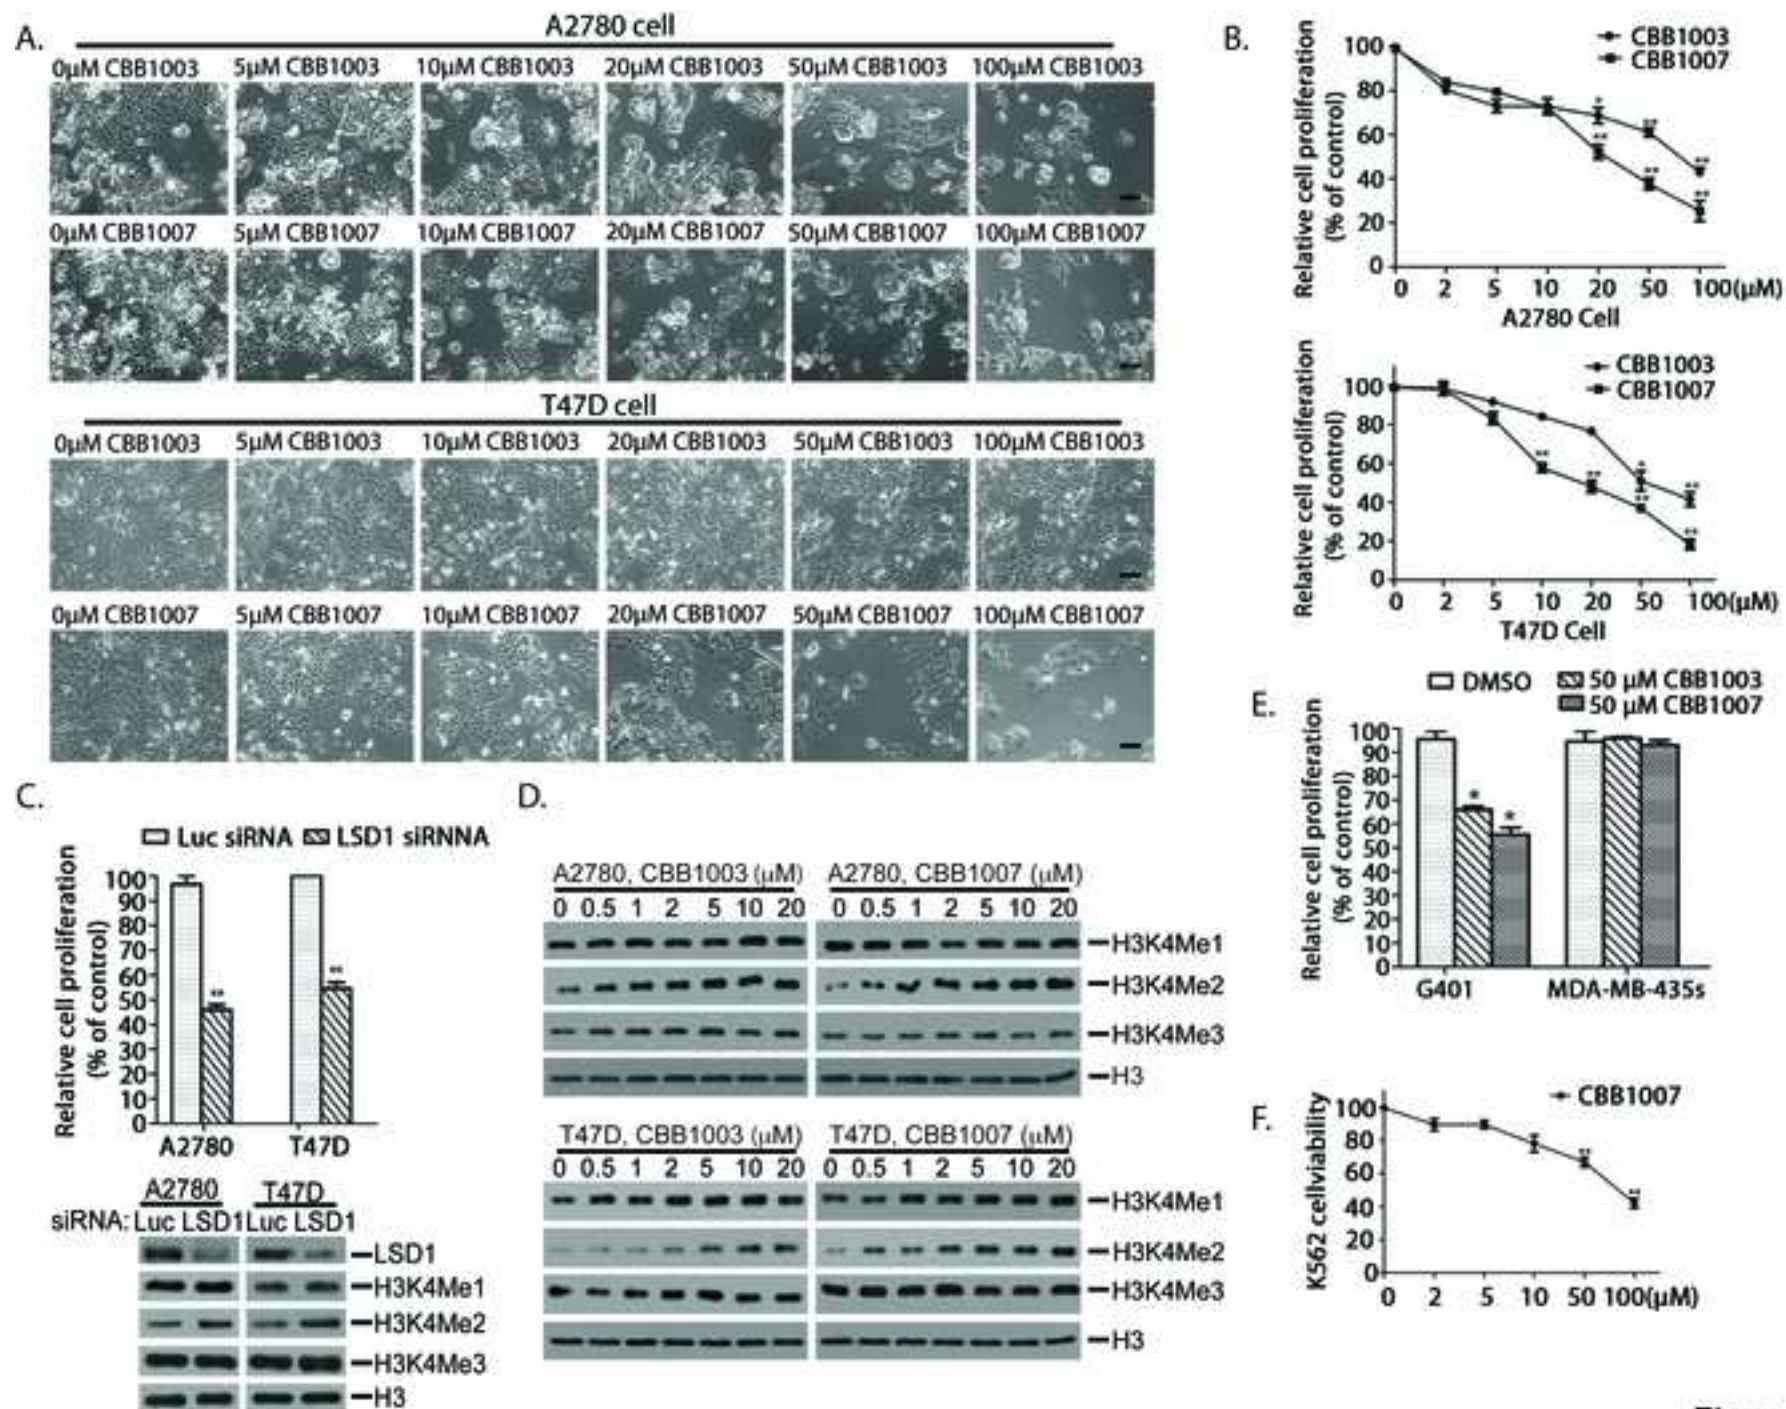

Figure S2



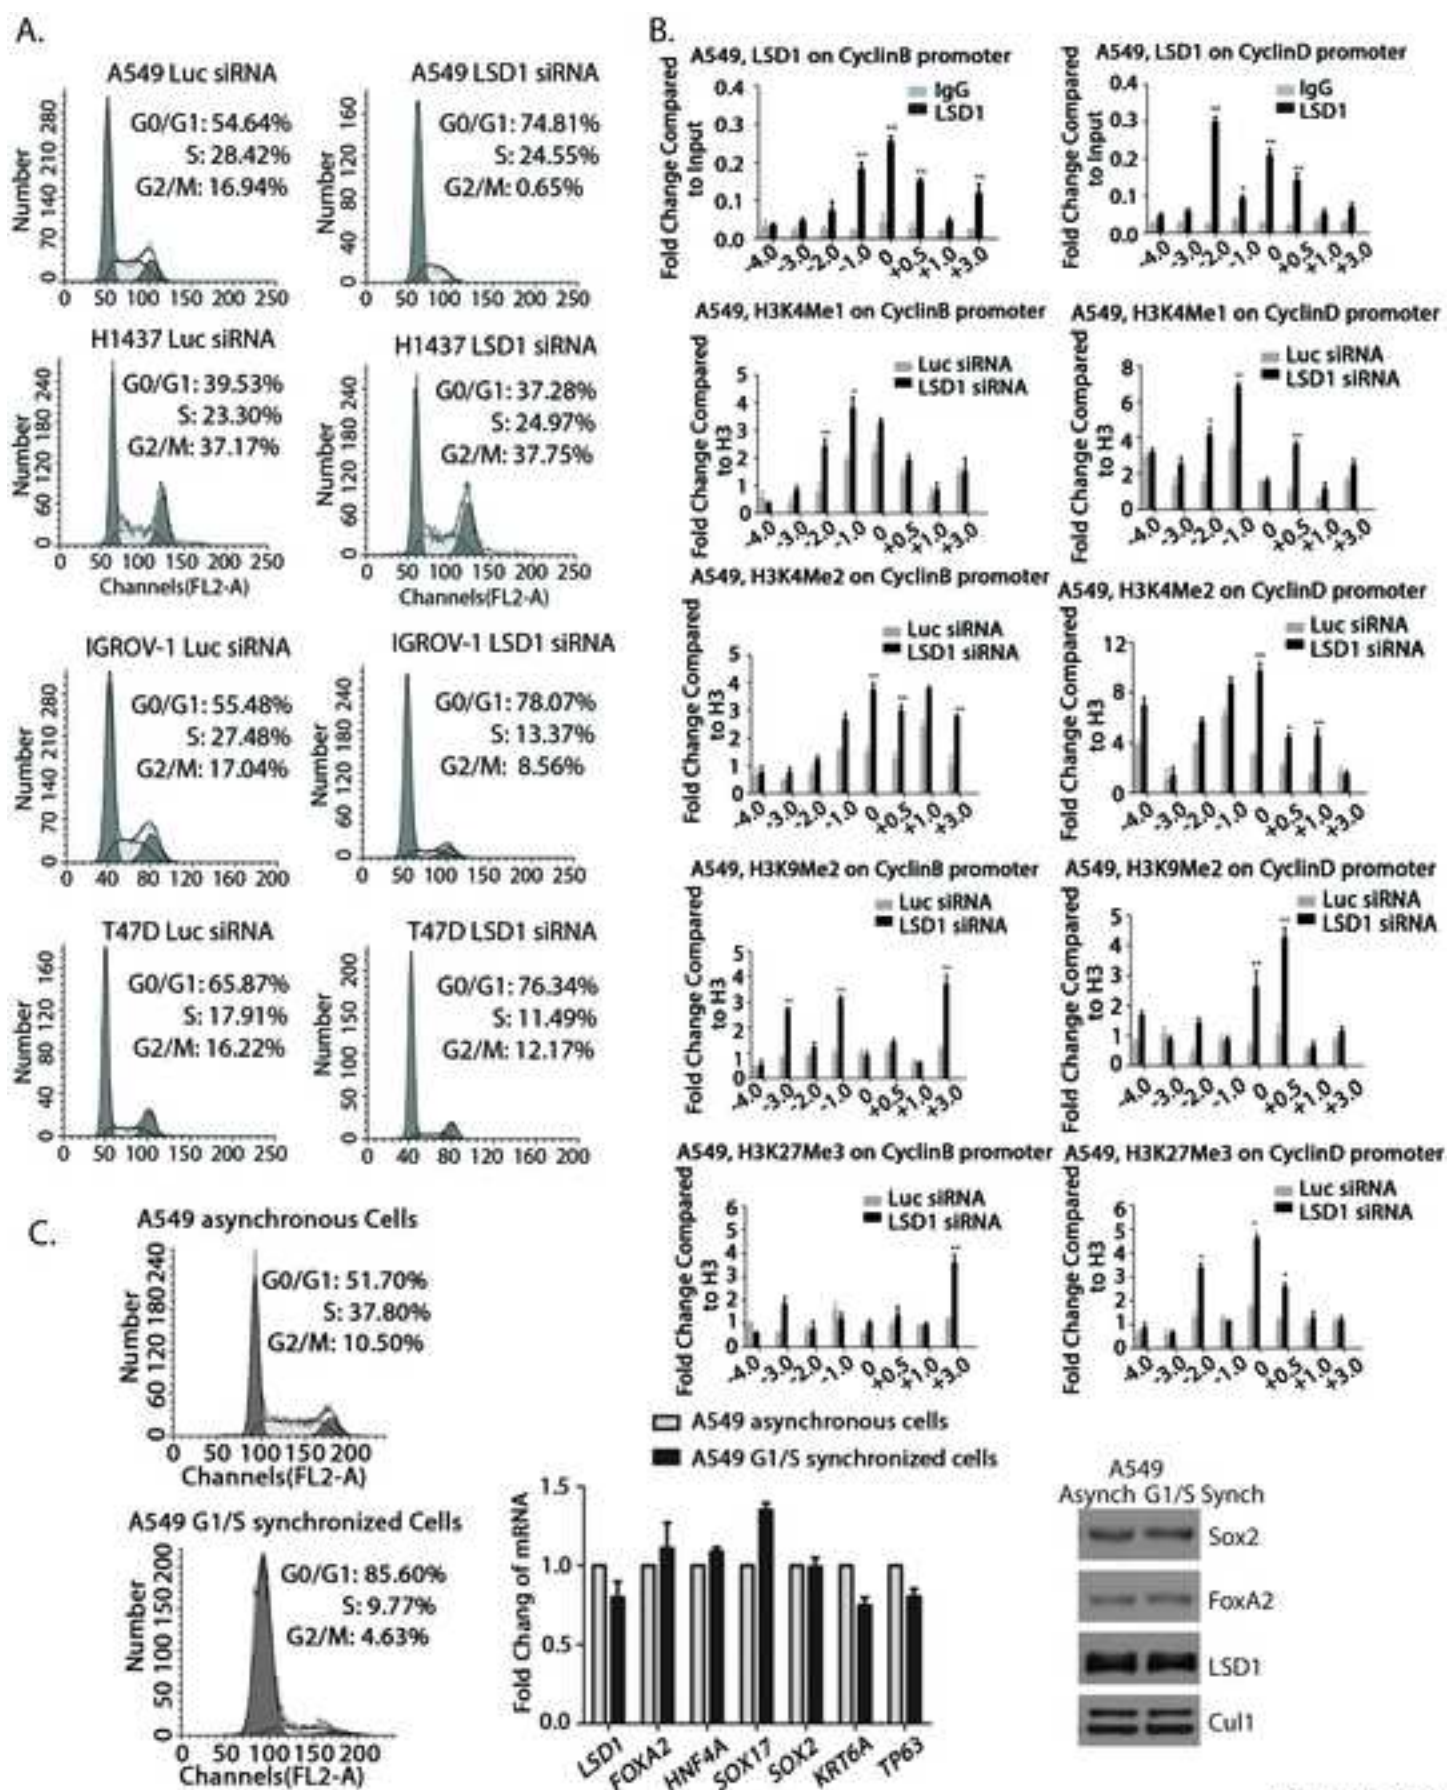

Figure S3

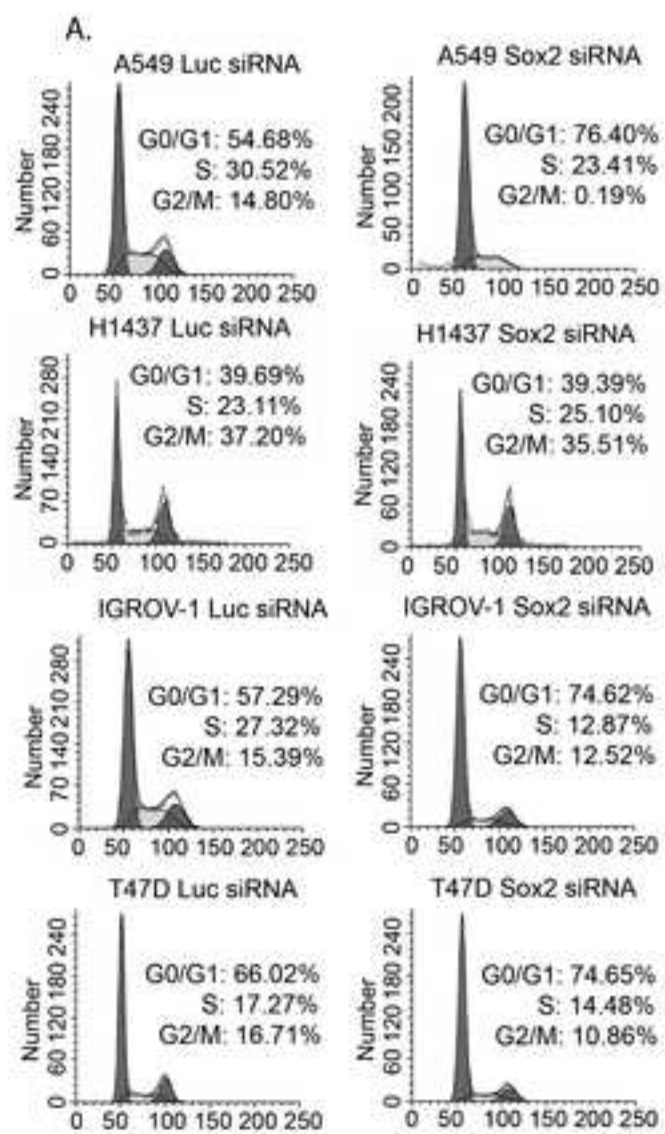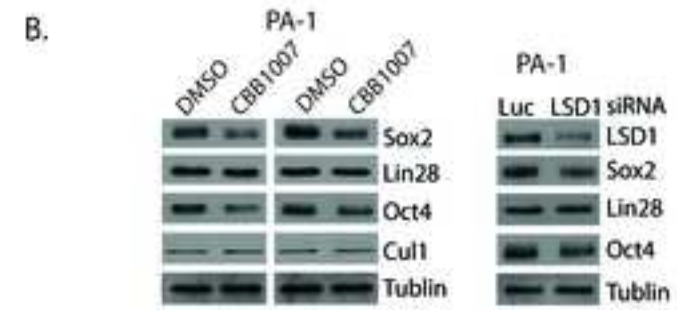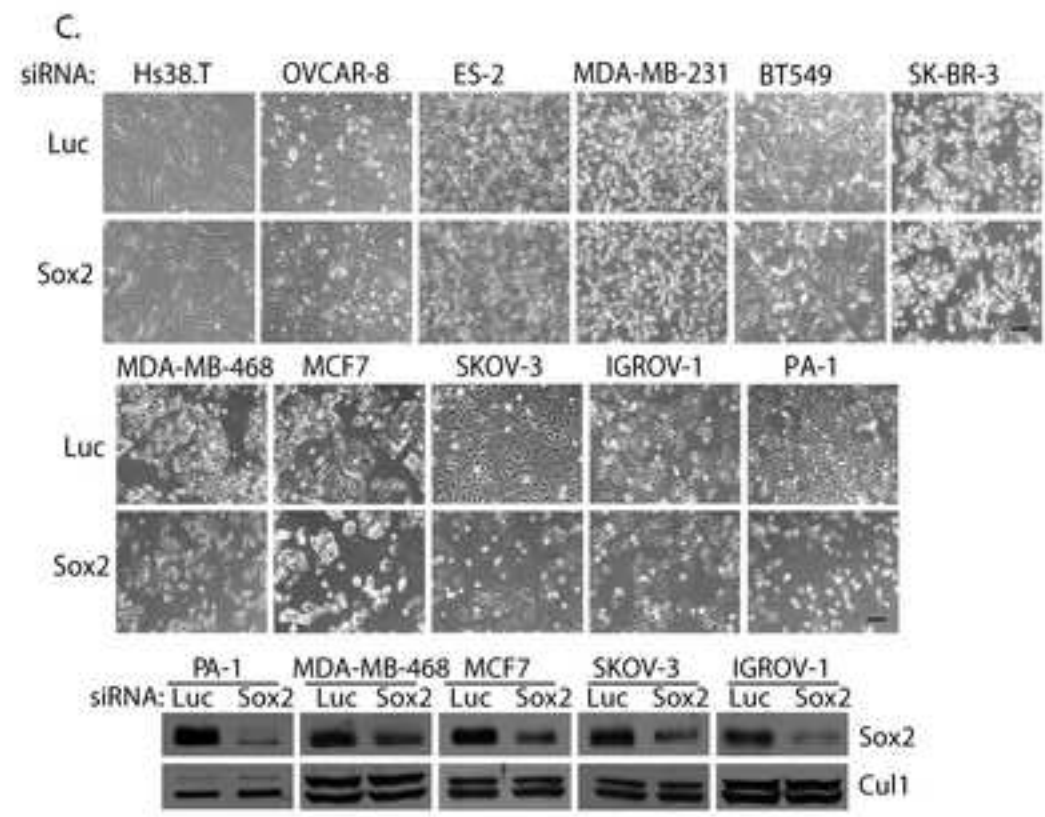

Figure S4

A.

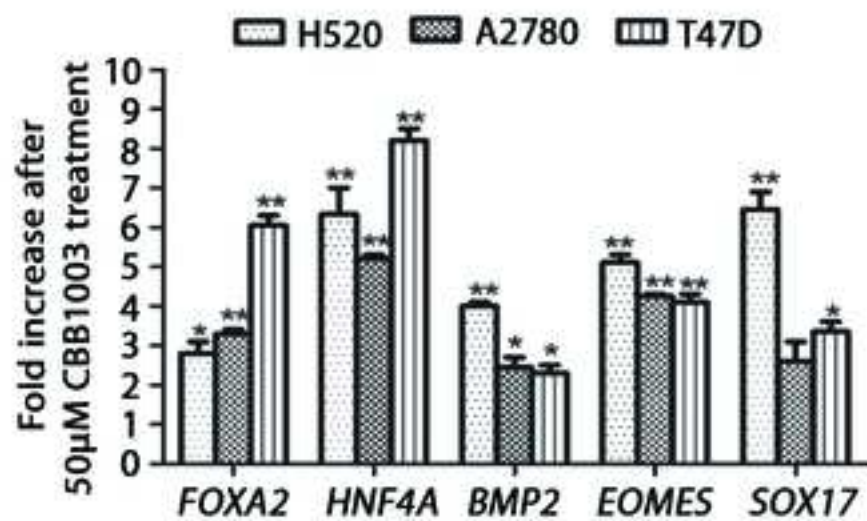

B.

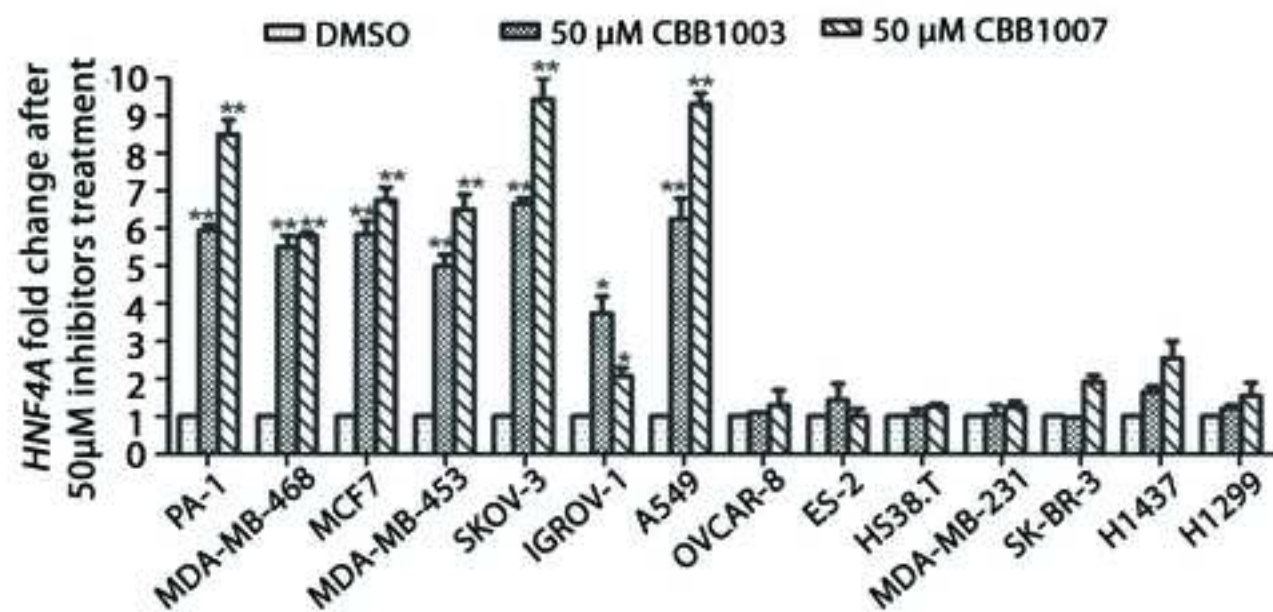

Figure S5



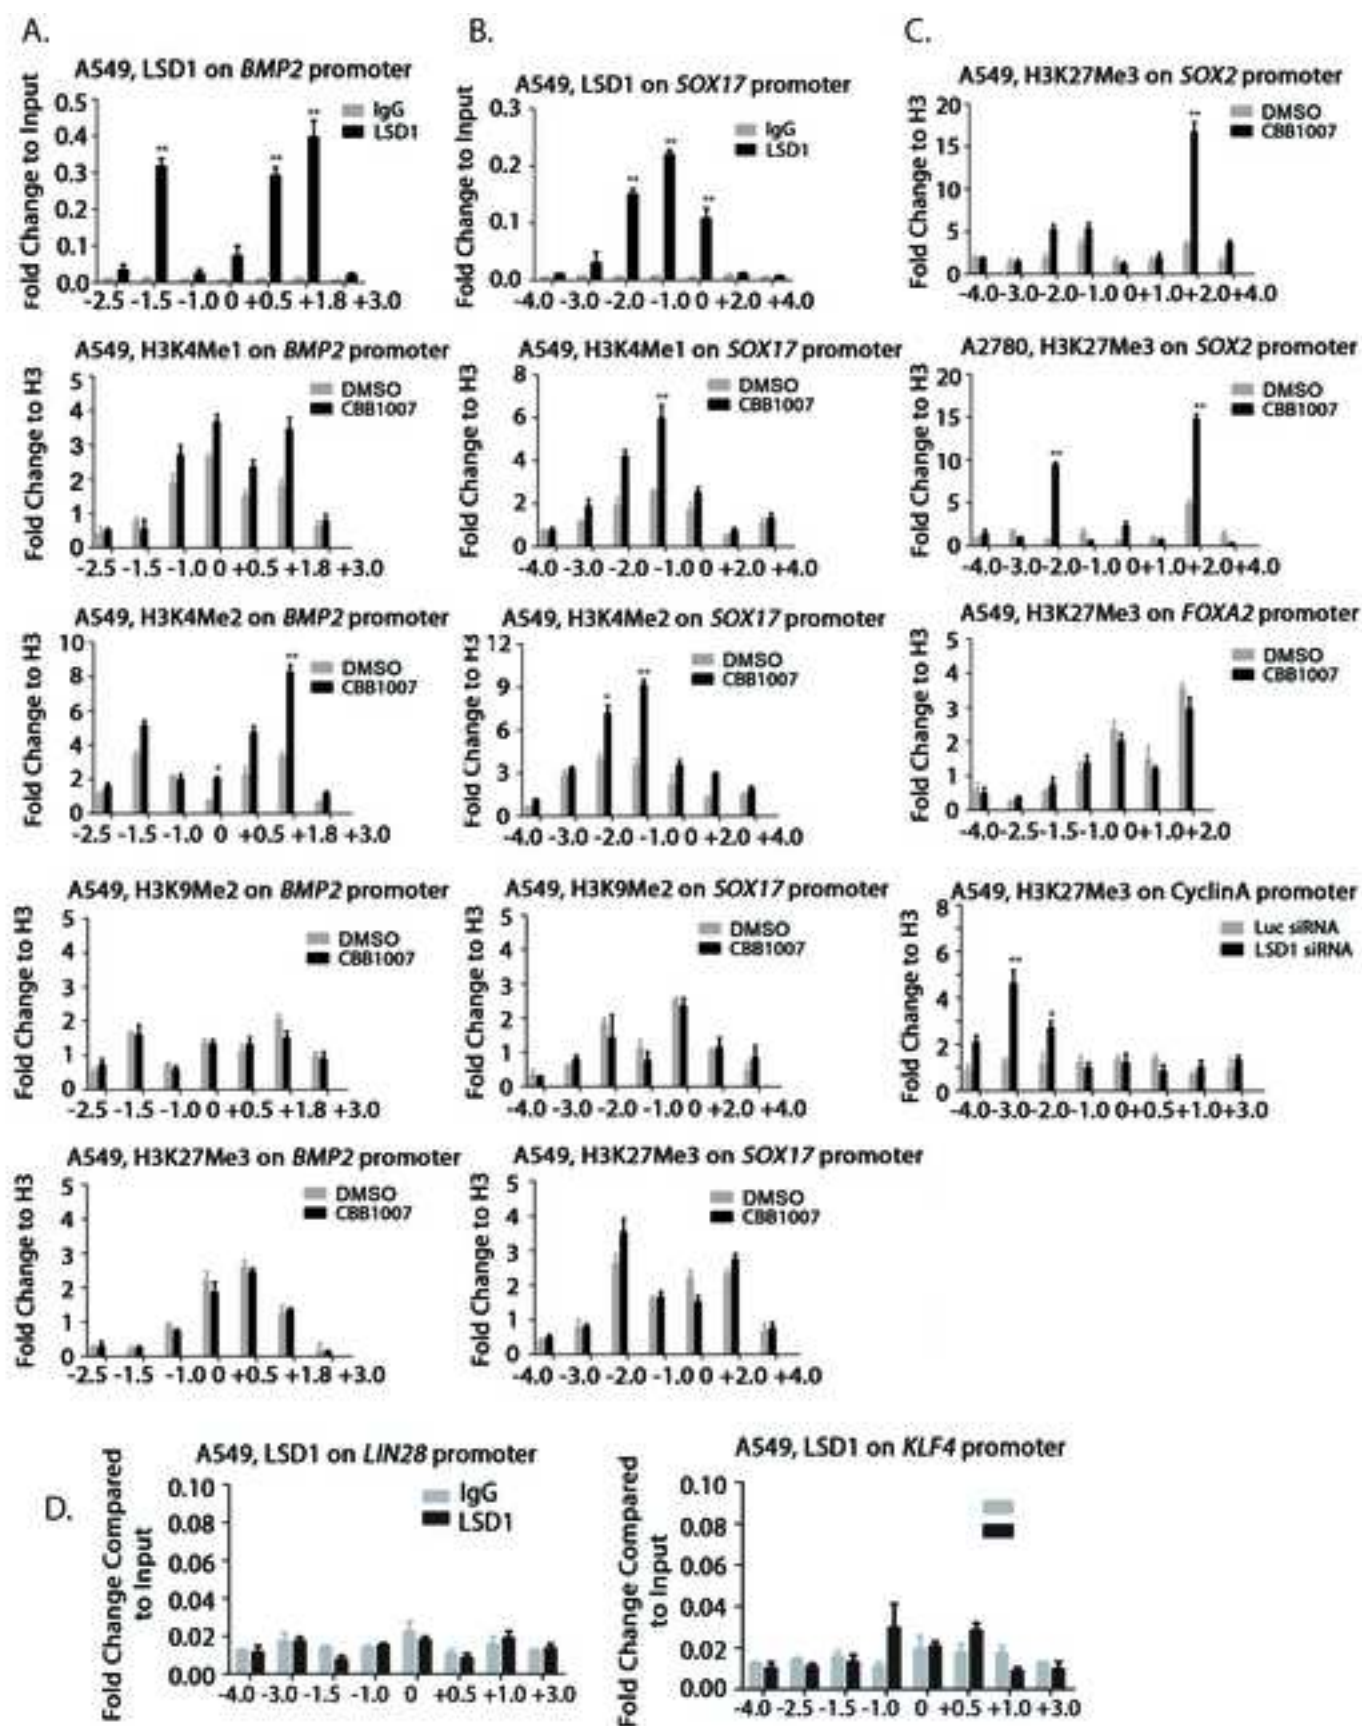

Figure S6

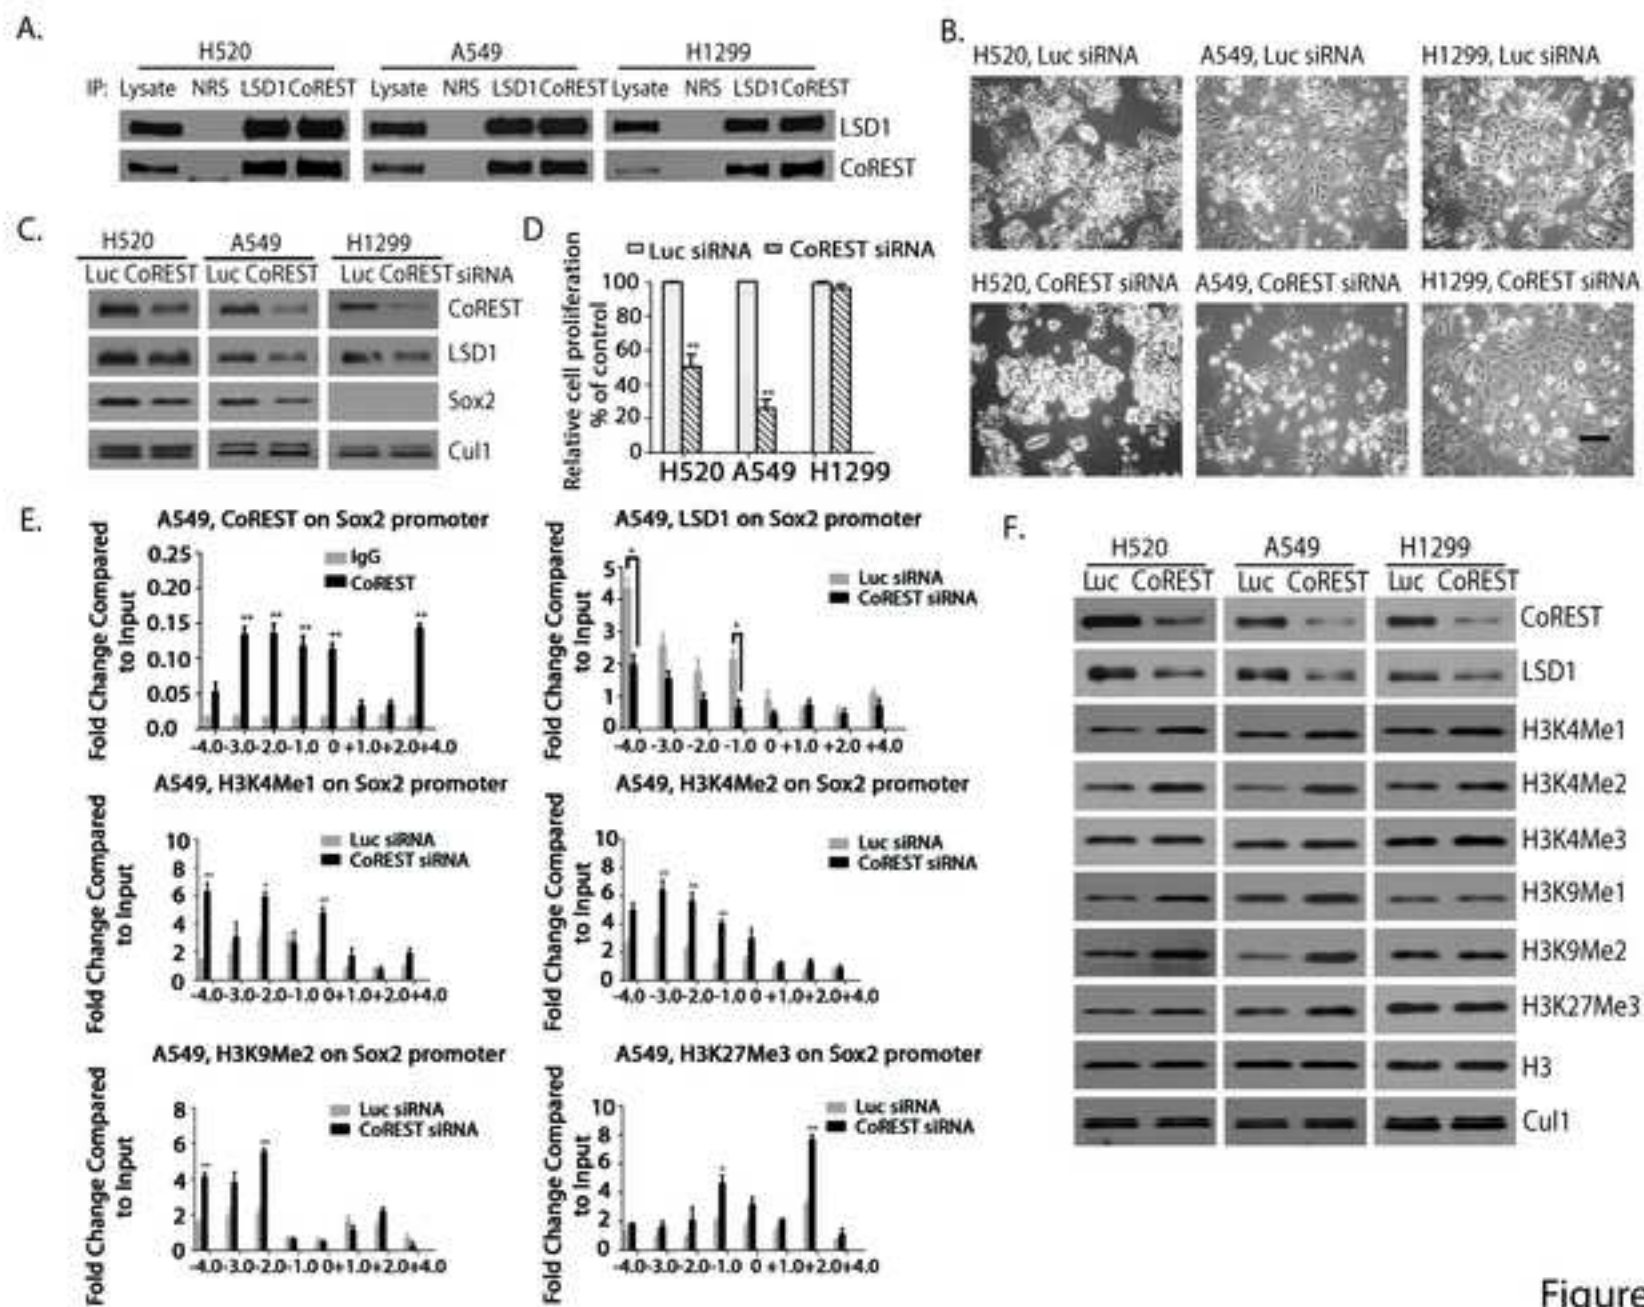

Figure S7

**Table S1**

| Type                                      | Differentiation degree            | LSD1 expression | Sox2 expression | total |
|-------------------------------------------|-----------------------------------|-----------------|-----------------|-------|
| Lung Squamous Carcinomas (13 cases)       | Poorly differentiated (5/13)      | +++             | +++             | 5     |
|                                           | Moderately differentiated (8/13)  | +++             | +++             | 1     |
|                                           |                                   | ++              | +++             | 3     |
|                                           |                                   | +               | ++              | 3     |
|                                           |                                   | +               | —               | 1     |
| Lung adenocarcinoma Carcinomas (17 cases) | Poorly differentiated (2/17)      | ++/+++          | —               | 2     |
|                                           | Moderately differentiated (15/17) | + / ++          | —               | 15    |

The criteria for scoring the immunoreactivity were: + < 50%; 50% < ++ < 90%; 90% < +++ < 100%; —: non-detectable.



**Table S2**

Cancer Cells Analyzed for Sensitivity to LSD1 Inhibitors and Sox2 Expression

| Cell Lines  | Sources | Cancer Types                       | Oct4 | Lin28 | Sox2 | Sensitivity to LSD1 inhibitors |
|-------------|---------|------------------------------------|------|-------|------|--------------------------------|
| F9*         | ATCC    | Murine teratocarcinoma             | Yes  | Yes   | Yes  | Yes                            |
| PA-1**      | ATCC    | Ovarian teratocarcinoma            | Yes  | Yes   | Yes  | Yes                            |
| NTERA-2**   | ATCC    | Embryonal carcinoma                | Yes  | Yes   | Yes  | Yes                            |
| Hs38.T      | ATCC    | Ovarian teratoma (fibroblast-like) | No   | No    | No   | No                             |
| HeLa        | ATCC    | Cervical adenocarcinoma            | No   | No    | No   | No                             |
| IGROV-1     | NCI-60  | Ovarian adenocarcinoma             | Yes  | Yes   | Yes  | Yes                            |
| A2780**     | NCI-60  | Ovarian carcinoma                  | No   | Yes   | Yes  | Yes                            |
| SKOV-3      | NCI-60  | Ovarian adenocarcinoma             | No   | No    | Yes  | Yes                            |
| OVCAR-3     | NCI-60  | Ovarian adenocarcinoma             | No   | No    | Yes  | Yes                            |
| OVCAR-8     | NCI-60  | Ovarian carcinoma                  | No   | No    | No   | No                             |
| ES-2        | ATCC    | Ovarian carcinoma                  | No   | No    | No   | No                             |
| MCF7        | NCI-60  | Breast adenocarcinoma              | No   | No    | Yes  | Yes                            |
| T47D        | NCI-60  | Breast ductal carcinoma            | No   | Yes   | Yes  | Yes                            |
| MDA-MB-453  | ATCC    | Breast carcinoma                   | No   | No    | Yes  | Yes                            |
| MDA-MB-468  | NCI-60  | Breast adenocarcinoma              | No   | No    | Yes  | Yes                            |
| MDA-MB-231  | NCI-60  | Breast adenocarcinoma              | No   | No    | No   | No                             |
| MDA-MB-361  | ATCC    | Breast adenocarcinoma              | No   | No    | Yes  | Yes                            |
| SK-BR-3     | ATCC    | Breast adenocarcinoma              | No   | No    | No   | No                             |
| BT-549      | ATCC    | Breast ductal carcinoma            | No   | No    | No   | No                             |
| NCI-H520    | ATCC    | Lung squamous cell carcinoma       | No   | No    | Yes  | Yes                            |
| NCI-H1437   | ATCC    | Lung adenocarcinoma                | No   | No    | No   | No                             |
| A549        | NCI-60  | Lung carcinoma                     | No   | No    | Yes  | Yes                            |
| H1299       | ATCC    | Lung carcinoma                     | No   | No    | No   | No                             |
| G401**      | ATCC    | Kidney rhabdoid tumor              | No   | Yes   | Yes  | Yes                            |
| MDA-MB-435s | NCI-60  | Melanoma                           | No   | No    | No   | No                             |
| K562        | NCI-60  | Myelogenous leukemia               | No   | No    | Yes  | Yes                            |

\*: Also expresses Nanog and Sall4

\*\*: Also express Sall4

**Table S3:** Primer Sequences for Quantitative Real-Time PCR/RT-PCR**Chromatin Immunoprecipitation (ChIP) qPCR analysis:**

| Gene                   | Primer sequence (5'-3') |
|------------------------|-------------------------|
| SOX2_human (-4000)-F   | AATACTGGTGGTCGTCAAAC    |
| SOX2_human (-4000)-R   | TGAGAACTAGCCAAGCATCT    |
| SOX2_human (-3000)-F   | TGCTGGATTGAAATAGAGTG    |
| SOX2_human (-3000)-R   | TAAGCCTGCTGTACTTATCG    |
| SOX2_human (-2000)-F   | CTTAGACGAGGCTTTGTTTG    |
| SOX2_human(-2000)-R    | GGGTTAGAGGAGGATGAGAT    |
| SOX2_human (-1000)-F   | TTTGGGTCTCCTAACTTCTA    |
| SOX2_human (-1000)-R   | GTCATTGTTCTCCCGCTCAT    |
| SOX2_human (0)-F       | CAGGAGTTGTCAAGGCAGAG    |
| SOX2_human (0)-R       | GGAAAATCAGGCGAAGAATA    |
| SOX2_human (+1000)-F   | CATCACCCACAGCAAATGAC    |
| SOX2_human (+1000)-R   | TTCCTGCAAAGCTCCTACCG    |
| SOX2_human (+2000)-F   | TACTGTGCTCAGCCAAGAAA    |
| SOX2_human (+2000)-R   | GCAACAAGTGGCATAAATCA    |
| SOX2_human (+4000)-F   | TCCCGGAATTTGAGGCAGTC    |
| SOX2_human (+4000)-R   | TTGGCTCGGCGATATGAAGG    |
| FOXA2_human (-4000)-F  | CAACCTTCGGCACAACGATC    |
| FOXA2_human (-4000)-R  | GAAGCCACCATACAAACCTGA   |
| FOXA2_human (-2500)-F  | AATAGTGCTGTGGTGGAGGT    |
| FOXA2_human (-2500)-R  | TTTGTGAGCTTATGTGGGTG    |
| FOXA2_human (-1500)-F  | CCTGTGCCTACTGCTACCTC    |
| FOXA2_human (-1500)-R  | GTTAGCCTGTGAGCCCAGAT    |
| FOXA2_human (-1000)-F  | GCTTCTCCCGAGGCCGTTCC    |
| FOXA2_human (-1000)-R  | ACTCGCCCCTGCTGCTCCT     |
| FOXA2_human (0)-F      | CCGCCCACTTCCAACCTACCG   |
| FOXA2_human (0)-R      | GTCAGCCAAAGCACCGTCCC    |
| FOXA2_human (+1000)-F  | GGTGTACTCCCGGCCCATTA    |
| FOXA2_human (+1000)-R  | ATTTCTTCTCCCTTGCCTCT    |
| FOXA2_human (+2000)-F  | CCAGGTCTCGGGTCCGATTA    |
| FOXA2_human (+2000)-R  | CCCTCCCTCCTTCTTGAAAT    |
| Lin28A_human(-4000)-F  | GGGTGGATCACGAGGTCA      |
| Lin28A_human (-4000)-R | CCAGGTTCAAGCCATTCT      |
| Lin28A_human (-3000)-F | TTGCAGCGAGCCAAGATC      |
| Lin28A_human (-3000)-R | TGTAAAGGGTTAGGAAAGAA    |
| Lin28A_human (-1500)-F | TAAATGGGTTGTAGTGGTGG    |
| Lin28A_human (-1500)-R | TACTGCCCTGGTCGGAGA      |
| Lin28A_human (-1000)-F | AGGCAGACATTCAGATGTAGT   |
| Lin28A_human (-1000)-R | GTGCTTAGATAGACCTGGAGT   |
| Lin28A_human (0)-F     | AAAGGGAGGGGAAAGGAGA     |
| Lin28A_human (0)-R     | GCACAATAGCGGTGGGAG      |
| Lin28A_human (+500)-F  | TGCGCCAAGGCGGCAGAAGA    |
| Lin28A_human (+500)-R  | TGGACAGGAAGCCGAACCC     |

|                        |                       |
|------------------------|-----------------------|
| Lin28A_human (+1000)-F | GGGGCGTAAAGCCGAGAA    |
| Lin28A_human (+1000)-R | ACGGGAAGTGGACAGCAAAG  |
| Lin28A_human (+3000)-F | ATGGCATGATCTCCACTCA   |
| Lin28A_human (+3000)-R | CCTGTAATCCCAGCACTTT   |
| KLF4_human (-4000)-F   | GAGCCAAGATCACGCCACT   |
| KLF4_human (-4000)-R   | TGCCGCAGGACTCAAGAA    |
| KLF4_human (-2500)-F   | GATCTTAGAGGGATTCTCTGG |
| KLF4_human (-2500)-R   | TGTTTGAACCCTGCGATT    |
| KLF4_human (-1500)-F   | TGGCGCACGCCTGTAATC    |
| KLF4_human (-1500)-R   | CATCTCGAAGCCCTTTCC    |
| KLF4_human (-1000)-F   | GGAGATGGAGGGCTGGATG   |
| KLF4_human (-1000)-R   | GCGAAGACTGGTGGGGTCA   |
| KLF4_human (0)-F       | ACGCTGCTGAGTGGAAGA    |
| KLF4_human (0)-R       | AATTGGCCGAGATCCTTC    |
| KLF4_human (+500)-F    | TGTATGCCCGTGGTGCGA    |
| KLF4_human (+500)-R    | TCTGGCCCAGCCAGTGTC    |
| KLF4_human (+1000)-F   | GAGACCGAGGAGTTCAACGA  |
| KLF4_human (+1000)-R   | GCGACGACGAAGAGGAGG    |
| KLF4_human (+3000)-F   | GGTGTAGGTGGTGGTTGT    |
| KLF4_human (+3000)-R   | TGACCCTATCCTAAAGAAAT  |
| BMP2_human (-2500)-F   | CCCAGCGGGGAAATAAGAGG  |
| BMP2_human (-2500)-R   | CGCCTCCACTCCCTGCTC    |
| BMP2_human (-1500)-F   | TCCTAAGGAGGACGACAGCA  |
| BMP2_human (-1500)-R   | TCGGAGATGGCGAAGCAG    |
| BMP2_human (-1000)-F   | TCTTCCACCCCTCTTTCT    |
| BMP2_human (-1000)-R   | AGGGATTTCTTTGACCCA    |
| BMP2_human (0)-F       | GAGGGCAAATCCCAAATC    |
| BMP2_human (0)-R       | GGTAAGACCGACCGAAGC    |
| BMP2_human (+500)-F    | AGTAACTCCGCACCCTCT    |
| BMP2_human (+500)-R    | TTGCACGTTTAGCTGACTAG  |
| BMP2_human (+1800)-F   | ATAAAAGCGTTTGTAGCA    |
| BMP2_human (+1800)-R   | CAAGCAGAAATATCCCAC    |
| BMP2_human (+3000)-F   | CCAGGTGCTTCTTGTTCT    |
| BMP2_human (+3000)-R   | TTTGTGGAAAGAGGGTTA    |
| TP63_human (-4000)-F   | AGTGGCTACCACATCAGA    |
| TP63_human (-4000)-R   | CACATTAGACACCGAGTA    |
| TP63_human (-2500)-F   | GCTCATGCCTGTAATCCC    |
| TP63_human (-2500)-R   | TCTGCCTCAGCTTCCTGT    |
| TP63_human (-1500)-F   | TCTCGGGCTAAGTAAAGG    |
| TP63_human (-1500)-R   | AGTTCACATCTTCCCTTC    |
| TP63_human (-1000)-F   | TAAAGAATAGAGTGGAGCCG  |
| TP63_human (-1000)-R   | TTTGCCTGACCCGAATAA    |
| TP63_human (0)-F       | AAAATCAAGAAACGCTCCG   |
| TP63_human (0)-R       | GCAATAGGGTCAAATGCT    |
| TP63_human (+500)-F    | CAGCACCTACTCACTCAA    |



|                         |                       |
|-------------------------|-----------------------|
| TP63_human (+500)-R     | AATGACAAGCCACAATCT    |
| TP63_human (+1000)-F    | GGGGTCTCCAAGGTTTCA    |
| TP63_human (+1000)-R    | AACCCAATCCTCAACTGC    |
| TP63_human (+3000)-F    | GGGACTTCATCCTCTGTT    |
| TP63_human (+3000)-R    | GGTAATGTGATTTTATCCAAC |
| KRT6A_human (-4000)-F   | CCTTCGTGCTTCTGTCTA    |
| KRT6A_human (-4000)-R   | TTCAGTGCCTAATCTTGC    |
| KRT6A_human (-2500)-F   | ACCACCTTTCCTTCCAAT    |
| KRT6A_human (-2500)-R   | CAGGCTTGTGCCACATTA    |
| KRT6A_human (-1500)-F   | CTTGCCAGACGCTGAGTT    |
| KRT6A_human (-1500)-R   | AGCAGTCCCATTTCTCCA    |
| KRT6A_human (-1000)-F   | TGGCAGAAGTCAGGTCTC    |
| KRT6A_human (-1000)-R   | CTTTACTGTAGGAGCAAC    |
| KRT6A_human (0)-F       | GCTGGAAGGCAGGAGAAT    |
| KRT6A_human (0)-R       | GGTGAGCTTGCAGGTTGG    |
| KRT6A_human (+500)-F    | GAGGTCACCGTCAACCAG    |
| KRT6A_human (+500)-R    | CGATGAAGGAGGCAAAC     |
| KRT6A_human (+1500)-F   | TGTTTCGAGCAGTACATCAA  |
| KRT6A_human (+1500)-R   | CCTGGTCACCCAATAGTC    |
| KRT6A_human (+3000)-F   | GAACCTTATGCCCAAGTCAA  |
| KRT6A_human (+3000)-R   | CCTCATTATGGCACCCT     |
| Sox17_human (-4000)-F   | ACGCTGCTGATAAGGCTGTC  |
| Sox17_human (-4000)-R   | TGGGCTGTGGAACCTCATA   |
| Sox17_human (-3000)-F   | CCAAGAACAAGGGCAAATAA  |
| Sox17_human (-3000)-R   | TCAAGCGATTCTCCTGTCTC  |
| Sox17_human (-2000)-F   | GGAGGCTGAGACAGGAGAAT  |
| Sox17_human (-2000)-R   | GGAGCCAAGAAGGTGGAGAA  |
| Sox17_human (-1000)-F   | TCTTTGCTAATGCTGGAGGG  |
| Sox17_human (-1000)-R   | AAATGTCCGAGTTTGTGTTGG |
| Sox17_human (0)-F       | CAGTGCCTCACTCCCCACCC  |
| Sox17_human (0)-R       | GCCTCGCCCTTCACCTTCAT  |
| Sox17_human (+2000)-F   | TTCCCATAGTTGGATTGTCA  |
| Sox17_human (+2000)-R   | GCATTTATGTTACCCCTTTT  |
| Sox17_human (+4000)-F   | TGTCCCAAGAGTCCCAGTA   |
| Sox17_human (+4000)-R   | AACACCAATCCCTCCATCCA  |
| CyclinA_human (-4000)-F | AGGGAAAGAAGGAGTGAG    |
| CyclinA_human (-4000)-R | ACCTTGCAGAGCTATTGT    |
| CyclinA_human (-3000)-F | ACCTCAGCCTCCCAAAGT    |
| CyclinA_human (-3000)-R | TAGCAGCATCCAATAGCAA   |
| CyclinA_human (-2000)-F | TAGACCGCTTTATAGGCT    |
| CyclinA_human (-2000)-R | CATACATAGTAACCAGGAC   |
| CyclinA_human (-1000)-F | CAGTAGTTCAAGGTGCCA    |
| CyclinA_human (-1000)-R | CTTAACATTTAGGCGTTTAT  |
| CyclinA_human (0)-F     | CCTGCTCAGTTTCCTTTGGT  |
| CyclinA_human (0)-R     | ATCCCGCGACTATTGAAATG  |

CyclinA\_human (+500)-F GTTCTCCCATATTAGCATCA  
 CyclinA\_human (+500)-R GAGCTGAGCGAAGACTACA  
 CyclinA\_human (+1000)-F CCTTTGTGGGAATGCCTGTG  
 CyclinA\_human (+1000)-R GGGTGTGGCCTTTGCTT  
 CyclinA\_human (+3000)-F AGCCAGACATCACTAACA  
 CyclinA\_human (+3000)-R TGTAGTTCACAGCCAAAT  
 CyclinB\_human (-4000)-F CCGGTTGGAGTGCAGTAG  
 CyclinB\_human (-4000)-R CTGGGATTGGTGGTGTAT  
 CyclinB\_human (-3000)-F TCAGGAGTTTGAGGTTAC  
 CyclinB\_human (-3000)-R TCTGTTCAGGTATTTTGC  
 CyclinB\_human (-2000)-F GAAGGCAGGTGAAATGCT  
 CyclinB\_human (-2000)-R TGCGATTACAGGCCGTGAG  
 CyclinB\_human (-1000)-F ATCTGAGTAAAGGGCATA  
 CyclinB\_human (-1000)-R GTTTTAGCTTTCTATTTGGA  
 CyclinB\_human (0)-F GAGTGAGTGCCACGAACAGG  
 CyclinB\_human (0)-R ACCCAGCAGAAACCAACAGC  
 CyclinB\_human (+500)-F AGAGGTCGGCGGAAACTG  
 CyclinB\_human (+500)-R AGGTGGGGCACAAGGAGA  
 CyclinB\_human (+1000)-F AAATGCCTATGAAGAAGG  
 CyclinB\_human (+1000)-R TTTTCCAGTAGCTGAAGG  
 CyclinB\_human (+3000)-F GGCTGGTCTCGAACTCCT  
 CyclinB\_human (+3000)-R CTTCATGGCATCCTCAA  
 CyclinD\_human (-4000)-F GCAAGTCCGGAGTGGGG  
 CyclinD\_human (-4000)-R GAGACGCAGGGCTTCGCT  
 CyclinD\_human (-3000)-F AACCCAAGCCCCGAGCCC  
 CyclinD\_human (-3000)-R GCGTGTTCCGCCACCGTCC  
 CyclinD\_human (-2000)-F TCTGAGGCTTGGCTATGCG  
 CyclinD\_human (-2000)-R TGGGGAGCGATGGGTTGC  
 CyclinD\_human (-1000)-F AGGTAGGAAGGCAGCCCCGAAGA  
 CyclinD\_human (-1000)-R AGCAGCAGCCCAAGATGG  
 CyclinD\_human (0)-F ACCCAGCCAGGACCCACA  
 CyclinD\_human (0)-R GGTTTCCACTTCGCAGCAC  
 CyclinD\_human (+500)-F CGTTTCTTTGCTACTCACCC  
 CyclinD\_human (+500)-R CCACCCCTTCCTCCTTCA  
 CyclinD\_human (+1000)-F TGAAAGTGCGGCGTGGTG  
 CyclinD\_human (+1000)-R CTCGGGCGACCCTTTACC  
 CyclinD\_human (+3000)-F GGATGGAGGGAGATTTGCT  
 CyclinD\_human (+3000)-R GAAGGACGAGGCCAGAGTAA  
 SAT2\_human-F AATCATCGAATGGTCTCGAT  
 SAT2\_human-R ATAATTCCATTTCGATTCCAC  
 GAPDH\_human-F ACCACAGTCCATGCCATCA  
 GAPDH\_human-R CAGGGATGATGTTCTGGAGA

**mRNA qPCR analysis:**

| Gene                   | Primer sequence (5'-3')   |
|------------------------|---------------------------|
| SOX2_human-F           | GTGAGCGCCCTGCAGTACAA      |
| SOX2_human-R           | GCGAGTAGGACATGCTGTAGGTG   |
| LSD1_human-F           | AGCGTCATGGTCTTATCAA       |
| LSD1_human-R           | GAAATGTGGCAACTCGTC        |
| FOXA2_human-F          | CCCAACAAGATGCTGACGC       |
| FOXA2_human-R          | GCGAGTGGCGGATGGAGTT       |
| BMP2_human-F           | ACAGCGGAAACGCCTTAA        |
| BMP2_human-R           | GGGAGCCACAATCCAGTC        |
| EOMES_human-F          | CCCAGACCCAACCTTTCC        |
| EOMES_human-R          | GAGCCAATTTCTCTTTCACTT     |
| SOX17_human-F          | CTGCAGGCCAGAAGCAGTGTTA    |
| SOX17_human-R          | CCCAAAGTGTCAAGTGGCAGA     |
| HNF4A_human-F          | AGCTGCAGATCGATGACAATGAG   |
| HNF4A_human-R          | CATACTGGCGGTCGTTGATGTAG   |
| TP63_human-F           | CCTTACTTTGCTGAGGGTTTGAA   |
| TP63_human-R           | CAAGGCCCTAGTGTTACCTGAATAG |
| KRT6A_human-F          | GGCTGAGGAGCGTGAACAG       |
| KRT6A_human-R          | CAGGAACCGCACCTTGT         |
| $\beta$ -Actin_human-F | GGCCACGGCT GCTTC          |
| $\beta$ -Actin_human-R | GTTGGCGTACAGGTCTTTGC      |
